# Supplementary figures and images for: The Impact of Age on Statin-Related Glycemia: A Propensity Score-Matched Cohort Study in Korea
Source: MDPI journal article supplement (doi:10.3390/healthcare10050777), 2022-04-22

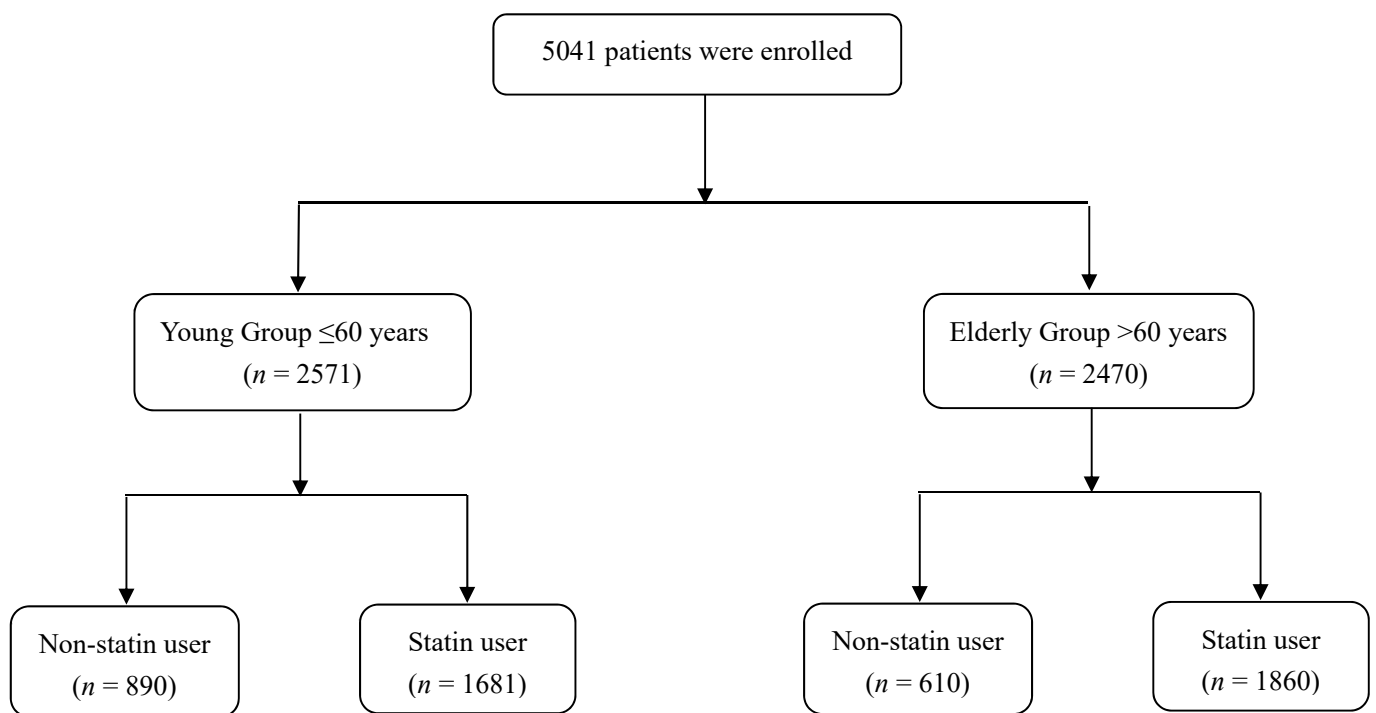

**Supplemental Figure S1.** Study participants recruitment flowchart.

Supplement: s1 [file s1]
